# Supplementary material for: Heterogeneous photochemistry of imidazole-2-carboxaldehyde: HO 2 radicalformation and aerosol growth
Source: Copernicus journal article supplement (doi:10.5194/acp-16-11823-2016), 2016-09-23
Supplement: Supplementary file 1 [file acp-16-11823-2016-supplement.zip]

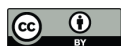

*Supplement of*

## **Heterogeneous photochemistry of imidazole-2-carboxaldehyde: HO<sub>2</sub> radical formation and aerosol growth**

**L. González Palacios et al.**

*Correspondence to:* Rainer Volkamer ([rainer.volkamer@colorado.edu](mailto:rainer.volkamer@colorado.edu))

- [acp-16-11823-2016-supplement-title-page.pdf](#)
- [Data Supplement.xlsx](#)
- [Supplement-RR.pdf](#)

The copyright of individual parts of the supplement might differ from the CC-BY 3.0 licence.
